# Supplementary material for: Intergenerational spillover effects of antiretroviral therapy in sub-Saharan Africa: a scoping review and future directions for research
Source: HighWire-hosted journal article supplement (doi:10.1136/bmjgh-2022-011079), 2023-04-01
Supplement: bmjgh-2022-011079supp001_data_supplement.pdf [file bmjgh-2022-011079supp001_data_supplement.pdf]

**Supplementary webappendix**

|                                                              |    |
|--------------------------------------------------------------|----|
| Text S1. Search history in PubMed.....                       | 2  |
| Text S2. Search history in Web of Science .....              | 4  |
| Text S3. Search history in Google Scholar .....              | 5  |
| Text S4. Search history in African Index Medicus .....       | 6  |
| Text S5. Search history in PsycINFO .....                    | 7  |
| Text S6. Search history in AIDSInfo .....                    | 8  |
| Text S7. Search history in OTseeker .....                    | 9  |
| Text S8. Search history in CINHALL .....                     | 10 |
| Text S9. Search history in EconLit .....                     | 11 |
| Figure S1. PRISMA flow diagram .....                         | 12 |
| Figure S2. Conceptual framework underpinning the study ..... | 13 |
| Table S1. Wealth and labour market outcomes.....             | 14 |
| Table S2. Health and health care utilization .....           | 17 |
| Table S3. Food security and nutrition .....                  | 19 |
| Table S4. Schooling outcomes.....                            | 20 |
| Table S5. Caregiving responsibilities .....                  | 22 |
| Table S6. Coresidence and relationships.....                 | 23 |

**Text S1. Search history in PubMed**

| <b>PubMed: Search terms (all years)</b>                                                                   |                                                                                                                                                                                                                                                                                                                                                                                                                                                                                                                                                                                                                                                                                                                                                                                                | <b>Results</b> |
|-----------------------------------------------------------------------------------------------------------|------------------------------------------------------------------------------------------------------------------------------------------------------------------------------------------------------------------------------------------------------------------------------------------------------------------------------------------------------------------------------------------------------------------------------------------------------------------------------------------------------------------------------------------------------------------------------------------------------------------------------------------------------------------------------------------------------------------------------------------------------------------------------------------------|----------------|
| <a href="https://pubmed.ncbi.nlm.nih.gov/">https://pubmed.ncbi.nlm.nih.gov/</a> (Search date: 20.04.2022) |                                                                                                                                                                                                                                                                                                                                                                                                                                                                                                                                                                                                                                                                                                                                                                                                |                |
| Concept 1<br>(ART)                                                                                        | "Anti-Retroviral Agents/therapeutic use"[Mesh] OR "Anti-Retroviral Agents/economics"[Mesh] OR "Antiretroviral Therapy, Highly Active"[Mesh] OR "Anti-HIV Agents/therapeutic use"[Mesh] OR "Acquired Immunodeficiency Syndrome/therapy"[Mesh] OR "Antiretroviral therapy" OR "HIV treatment"                                                                                                                                                                                                                                                                                                                                                                                                                                                                                                    | 109,977        |
| Concept 2<br>(inter-generational)                                                                         | "Child"[Mesh] OR "Adolescent"[Mesh] OR "Adult"[Mesh] OR "Aged"[Mesh] OR Intergenerational OR Infant* OR Child* OR Adolescent* OR Youth OR Kids OR "Early childhood" OR "Under-five children" OR "Middle childhood" OR "Adult" OR "Old age" OR "Older age" OR Elderly OR Grandparent* OR "Great-grandparent*"                                                                                                                                                                                                                                                                                                                                                                                                                                                                                   | 11,112,406     |
| Concept 3<br>(family, household)                                                                          | "Family"[Mesh] OR "Family Characteristics"[Mesh] OR "Household Work"[Mesh] OR Family OR Household*                                                                                                                                                                                                                                                                                                                                                                                                                                                                                                                                                                                                                                                                                             | 1,724,893      |
| Concept 4<br>(SSA)                                                                                        | "Africa South of the Sahara"[Mesh] OR "Sub Saharan Africa"                                                                                                                                                                                                                                                                                                                                                                                                                                                                                                                                                                                                                                                                                                                                     | 248,799        |
| #1 AND<br>#2 AND<br>#3 AND<br>#4                                                                          | ((("Anti-Retroviral Agents/therapeutic use"[Mesh] OR "Anti-Retroviral Agents/economics"[Mesh] OR "Antiretroviral Therapy, Highly Active"[Mesh] OR "Anti-HIV Agents/therapeutic use"[Mesh] OR "Acquired Immunodeficiency Syndrome/therapy"[Mesh] OR "Antiretroviral therapy" OR "HIV treatment") AND ("Child"[Mesh] OR "Adolescent"[Mesh] OR "Adult"[Mesh] OR "Aged"[Mesh] OR Intergenerational OR Infant* OR Child* OR Adolescent* OR Youth OR Kids OR "Early childhood" OR "Under-five children" OR "Middle childhood" OR "Adult" OR "Old age" OR "Older age" OR Elderly OR Grandparent* OR "Great-grandparent*")) AND ("Family"[Mesh] OR "Family Characteristics"[Mesh] OR "Household Work"[Mesh] OR Family OR Household*)) AND ("Africa South of the Sahara"[Mesh] OR "Sub Saharan Africa") | <b>2,042</b>   |

| PubMed: Search terms (last year)                                                                          |                                                                                                                                                                                                                                                                                                                                                                                | Results    |
|-----------------------------------------------------------------------------------------------------------|--------------------------------------------------------------------------------------------------------------------------------------------------------------------------------------------------------------------------------------------------------------------------------------------------------------------------------------------------------------------------------|------------|
| <a href="https://pubmed.ncbi.nlm.nih.gov/">https://pubmed.ncbi.nlm.nih.gov/</a> (Search date: 20.04.2022) |                                                                                                                                                                                                                                                                                                                                                                                |            |
| Concept 1<br>(only<br>keywords)                                                                           | “Antiretroviral therapy” OR “HIV treatment”                                                                                                                                                                                                                                                                                                                                    | 59,623     |
| Concept 2<br>(only<br>keywords)                                                                           | Intergenerational OR Infant* OR Child* OR Adolescent* OR Youth OR Kids OR “Early childhood” OR “Under-five children” OR “Middle childhood” OR “Adult” OR “Old age” OR “Older age” OR Elderly OR Grandparent* OR “Great-grandparent*”                                                                                                                                           | 11,112,406 |
| Concept 3                                                                                                 | Family OR Household*                                                                                                                                                                                                                                                                                                                                                           | 1,721,781  |
| Concept 4<br>(only<br>keywords)                                                                           | “Sub Saharan Africa”                                                                                                                                                                                                                                                                                                                                                           | 27,227     |
| #1 AND<br>#2 AND<br>#3 AND<br>#4<br>+ Filter                                                              | ((("Antiretroviral therapy" OR "HIV treatment") AND (Intergenerational OR Infant* OR Child* OR Adolescent* OR Youth OR Kids OR "Early childhood" OR "Under-five children" OR "Middle childhood" OR "Adult" OR "Old age" OR "Older age" OR Elderly OR Grandparent* OR "Great-grandparent*")) AND (Family OR Household*)) AND ("Sub Saharan Africa") Filters: in the last 1 year | <b>22</b>  |

Notes: The last year was also searched using only keywords to include recently published studies that have not been indexed with MeSH terms.

**Text S2. Search history in Web of Science**

| <b>Web of Science: Search terms</b>                                                                                                                 |                                                                                                                                                                                                       | <b>Results</b> |
|-----------------------------------------------------------------------------------------------------------------------------------------------------|-------------------------------------------------------------------------------------------------------------------------------------------------------------------------------------------------------|----------------|
| <a href="https://www.webofscience.com/wos/woscc/advanced-search">https://www.webofscience.com/wos/woscc/advanced-search</a> (Search date: 15.03.22) |                                                                                                                                                                                                       |                |
| Concept 1                                                                                                                                           | “Antiretroviral therapy” OR “HIV treatment”                                                                                                                                                           | 68,196         |
| Concept 2                                                                                                                                           | “Household” OR “Family” OR “Intergenerational” OR “Child” OR “Adult” OR “Older adult”                                                                                                                 | 3,452,812      |
| Concept 3                                                                                                                                           | “Sub Saharan Africa”                                                                                                                                                                                  | 41,076         |
| #1 AND<br>#2 AND<br>#3 AND<br>+ Filters                                                                                                             | "Antiretroviral therapy" OR "HIV treatment" (All Fields) and “Household” OR “Family” OR “Intergenerational” OR “Child” OR “Adult” OR “Older adult” (All Fields) and “Sub Saharan Africa” (All Fields) | <b>1,657</b>   |

**Text S3. Search history in Google Scholar**

| <b>Google Scholar: Search terms</b>                                                                            |                                                                                                                                                                                                                      | <b>Results</b>                              |
|----------------------------------------------------------------------------------------------------------------|----------------------------------------------------------------------------------------------------------------------------------------------------------------------------------------------------------------------|---------------------------------------------|
| <a href="https://scholar.google.com/">https://scholar.google.com/</a> (Advanced search, search date: 17.03.22) |                                                                                                                                                                                                                      |                                             |
| Concept 1                                                                                                      | “Antiretroviral therapy” OR “HIV treatment”                                                                                                                                                                          | About 19.200                                |
| Concept 2                                                                                                      | Household OR Family OR Intergenerational OR Child OR Adult OR “Older adult”                                                                                                                                          | About 6.330.000                             |
| Concept 3                                                                                                      | “Sub Saharan Africa”                                                                                                                                                                                                 | About 17.800                                |
| Specific term<br>Exact phrase<br>Any of these terms (Any year, relevance ranking)                              | “Antiretroviral therapy”<br>“Sub Saharan Africa”<br>Household Family Intergenerational Child Adult<br><br>("Antiretroviral therapy" Household OR Family OR Intergenerational OR Child OR Adult "Sub Saharan Africa") | About 67.600<br>(first <b>200</b> reviewed) |
| Simple search (Any year, relevance ranking)                                                                    | Antiretroviral therapy and intergenerational spillover effects on co-residing family members                                                                                                                         | <b>5</b>                                    |
| Simple search (Any year, relevance ranking)                                                                    | "Antiretroviral therapy" indirect impact on Household OR Family OR Intergenerational OR Child OR Adult in "Sub Saharan Africa"                                                                                       | About 24.600<br>(first <b>200</b> reviewed) |

**Text S4. Search history in African Index Medicus**

| <b>African Index Medicus: Search terms</b>                                                                                                  |                                                                                                                                                                             | <b>Results</b> |
|---------------------------------------------------------------------------------------------------------------------------------------------|-----------------------------------------------------------------------------------------------------------------------------------------------------------------------------|----------------|
| <a href="https://www.globalindexmedicus.net/biblioteca/aim/">https://www.globalindexmedicus.net/biblioteca/aim/</a> (Search date: 21.03.22) |                                                                                                                                                                             |                |
| Concept 1                                                                                                                                   | “Antiretroviral therapy” OR “HIV treatment”                                                                                                                                 | 245            |
| Concept 2                                                                                                                                   | Household OR Family OR Intergenerational OR Child OR Adult OR Older adult                                                                                                   | 803            |
| Concept 3                                                                                                                                   | “Sub Saharan Africa”                                                                                                                                                        | 444            |
| #1 AND<br>#2 AND<br>#3<br>(Limited to title,<br>abstract, subject)                                                                          | (tw:(“Antiretroviral therapy” OR “HIV treatment”)) AND<br>(tw:(Household OR Family OR Intergenerational OR Child OR Adult OR Older adult)) AND (tw:(“Sub Saharan Africa” )) | <b>5</b>       |
| #1<br>(Limited to title,<br>abstract, subject)                                                                                              | (tw:(“Antiretroviral therapy” OR “HIV treatment”))                                                                                                                          | <b>245</b>     |

**Text S5. Search history in PsycINFO**

| PsycInfo: Search terms                                                                                                                                                                                                                                          | Results                                                                                                                                                                                                          |
|-----------------------------------------------------------------------------------------------------------------------------------------------------------------------------------------------------------------------------------------------------------------|------------------------------------------------------------------------------------------------------------------------------------------------------------------------------------------------------------------|
| <a href="https://web.s.ebscohost.com/ehost/search/advanced?vid=0&amp;sid=7aad45da-fc67-4037-ad9f-5b37f9deac5b%40redis">https://web.s.ebscohost.com/ehost/search/advanced?vid=0&amp;sid=7aad45da-fc67-4037-ad9f-5b37f9deac5b%40redis</a> (Search date: 22.03.22) |                                                                                                                                                                                                                  |
| Concept 1                                                                                                                                                                                                                                                       | “Antiretroviral therapy” OR “HIV treatment”                                                                                                                                                                      |
| Concept 2                                                                                                                                                                                                                                                       | Household OR Family OR Intergenerational OR Child OR Adult OR “Older adult”                                                                                                                                      |
| Concept 3                                                                                                                                                                                                                                                       | “Sub Saharan Africa”                                                                                                                                                                                             |
| #1 AND<br>#2 AND<br>#3                                                                                                                                                                                                                                          | ( “Antiretroviral therapy” OR “HIV treatment” ) AND ( Household OR Family OR Intergenerational OR Child OR Adult OR “Older adult” ) AND ( sub saharan africa or sub-saharan africa or sub sahara or sub-sahara ) |
|                                                                                                                                                                                                                                                                 | 7,542                                                                                                                                                                                                            |
|                                                                                                                                                                                                                                                                 | 1,936,822                                                                                                                                                                                                        |
|                                                                                                                                                                                                                                                                 | 4,189                                                                                                                                                                                                            |
|                                                                                                                                                                                                                                                                 | <b>275</b>                                                                                                                                                                                                       |

**Text S6. Search history in AIDSInfo**

| AIDSInfo: Search terms                                                                                    |                        | Results |
|-----------------------------------------------------------------------------------------------------------|------------------------|---------|
| <a href="https://hivinfo.nih.gov/home-page">https://hivinfo.nih.gov/home-page</a> (Search date: 23.03.22) |                        |         |
| Concept 1                                                                                                 | Antiretroviral therapy | 27      |



**Text S7. Search history in OTseeker**

| <b>OTseeker: Search terms</b>                                                           | <b>Results</b>                                                                                                                                                                                                |
|-----------------------------------------------------------------------------------------|---------------------------------------------------------------------------------------------------------------------------------------------------------------------------------------------------------------|
| <a href="http://www.otseeker.com/">http://www.otseeker.com/</a> (Search date: 23.03.22) |                                                                                                                                                                                                               |
| Concept 1                                                                               | "Antiretroviral therapy" OR "HIV treatment" 80                                                                                                                                                                |
| Concept 2                                                                               | Household OR Family OR Intergenerational OR Child OR Adult OR "Older adult"                                                                                                                                   |
| Concept 3                                                                               | "Sub Saharan Africa"                                                                                                                                                                                          |
| #1 AND<br>#2 AND<br>#3                                                                  | [Any Field] like "Antiretroviral therapy" OR "HIV treatment" AND [Any Field] like 'Household OR Family OR Intergenerational OR Child OR Adult OR "Older adult"' AND [Any Field] like "'Sub Saharan Africa'" 1 |
| #1                                                                                      | [Any Field] like "Antiretroviral therapy" OR "HIV treatment" 80                                                                                                                                               |

**Text S8. Search history in CINHAL**

| <b>CINHAL: Search terms</b>                                                                                                                                                                                                                                     |                                                                                                                                                                                                                                                                                                                                                                           | <b>Results</b> |
|-----------------------------------------------------------------------------------------------------------------------------------------------------------------------------------------------------------------------------------------------------------------|---------------------------------------------------------------------------------------------------------------------------------------------------------------------------------------------------------------------------------------------------------------------------------------------------------------------------------------------------------------------------|----------------|
| <a href="https://web.p.ebscohost.com/ehost/search/advanced?vid=0&amp;sid=be01f787-282b-4ffa-9f65-051c5ad62f3d%40redis">https://web.p.ebscohost.com/ehost/search/advanced?vid=0&amp;sid=be01f787-282b-4ffa-9f65-051c5ad62f3d%40redis</a> (Search date: 26.03.22) |                                                                                                                                                                                                                                                                                                                                                                           |                |
| Concept 1                                                                                                                                                                                                                                                       | “Antiretroviral therapy” OR “HIV treatment”                                                                                                                                                                                                                                                                                                                               | 29,872         |
| Concept 2                                                                                                                                                                                                                                                       | Household OR Family OR Intergenerational OR Child OR Adult OR Older adult                                                                                                                                                                                                                                                                                                 | 2,276,861      |
| Concept 3                                                                                                                                                                                                                                                       | sub saharan africa or sub-saharan africa or sub sahara or sub-sahara                                                                                                                                                                                                                                                                                                      | 8,696          |
| #1 AND<br>#2 AND<br>#3                                                                                                                                                                                                                                          | ( “Antiretroviral therapy” OR “HIV treatment” ) AND ( Household OR Family OR Intergenerational OR Child OR Adult OR Older adult ) AND ( sub saharan africa or sub-saharan africa or sub sahara or sub-sahara )<br>Expanders - Apply related words; Also search within the full text of the articles; Apply equivalent subjects<br>Search modes - Find all my search terms | <b>726</b>     |

**Text S9. Search history in EconLit**

| <b>EconLit: Search terms</b>                                                                                                                                                                                                                                    |                                                                                                                                                                                                                | <b>Results</b> |
|-----------------------------------------------------------------------------------------------------------------------------------------------------------------------------------------------------------------------------------------------------------------|----------------------------------------------------------------------------------------------------------------------------------------------------------------------------------------------------------------|----------------|
| <a href="https://web.p.ebscohost.com/ehost/search/advanced?vid=0&amp;sid=36482e4e-d390-4798-90b5-f1f2d66b4ef6%40redis">https://web.p.ebscohost.com/ehost/search/advanced?vid=0&amp;sid=36482e4e-d390-4798-90b5-f1f2d66b4ef6%40redis</a> (Search date: 27.03.22) |                                                                                                                                                                                                                |                |
| Concept 1                                                                                                                                                                                                                                                       | “Antiretroviral therapy” OR “HIV treatment”                                                                                                                                                                    | 128            |
| Concept 2                                                                                                                                                                                                                                                       | Household OR Family OR Intergenerational OR Child OR Adult OR Older adult                                                                                                                                      | 192,487        |
| Concept 3                                                                                                                                                                                                                                                       | sub saharan africa or sub-saharan africa or sub sahara or sub-sahara                                                                                                                                           | 7,950          |
| #1 AND<br>#2 AND<br>#3                                                                                                                                                                                                                                          | ( “Antiretroviral therapy” OR “HIV treatment” ) AND ( Household OR Family OR Intergenerational OR Child OR Adult OR Older adult ) AND ( sub saharan africa or sub-saharan africa or sub sahara or sub-sahara ) | <b>10</b>      |
| #1                                                                                                                                                                                                                                                              | “Antiretroviral therapy” OR “HIV treatment”                                                                                                                                                                    | <b>128</b>     |

Figure S1. PRISMA flow diagram

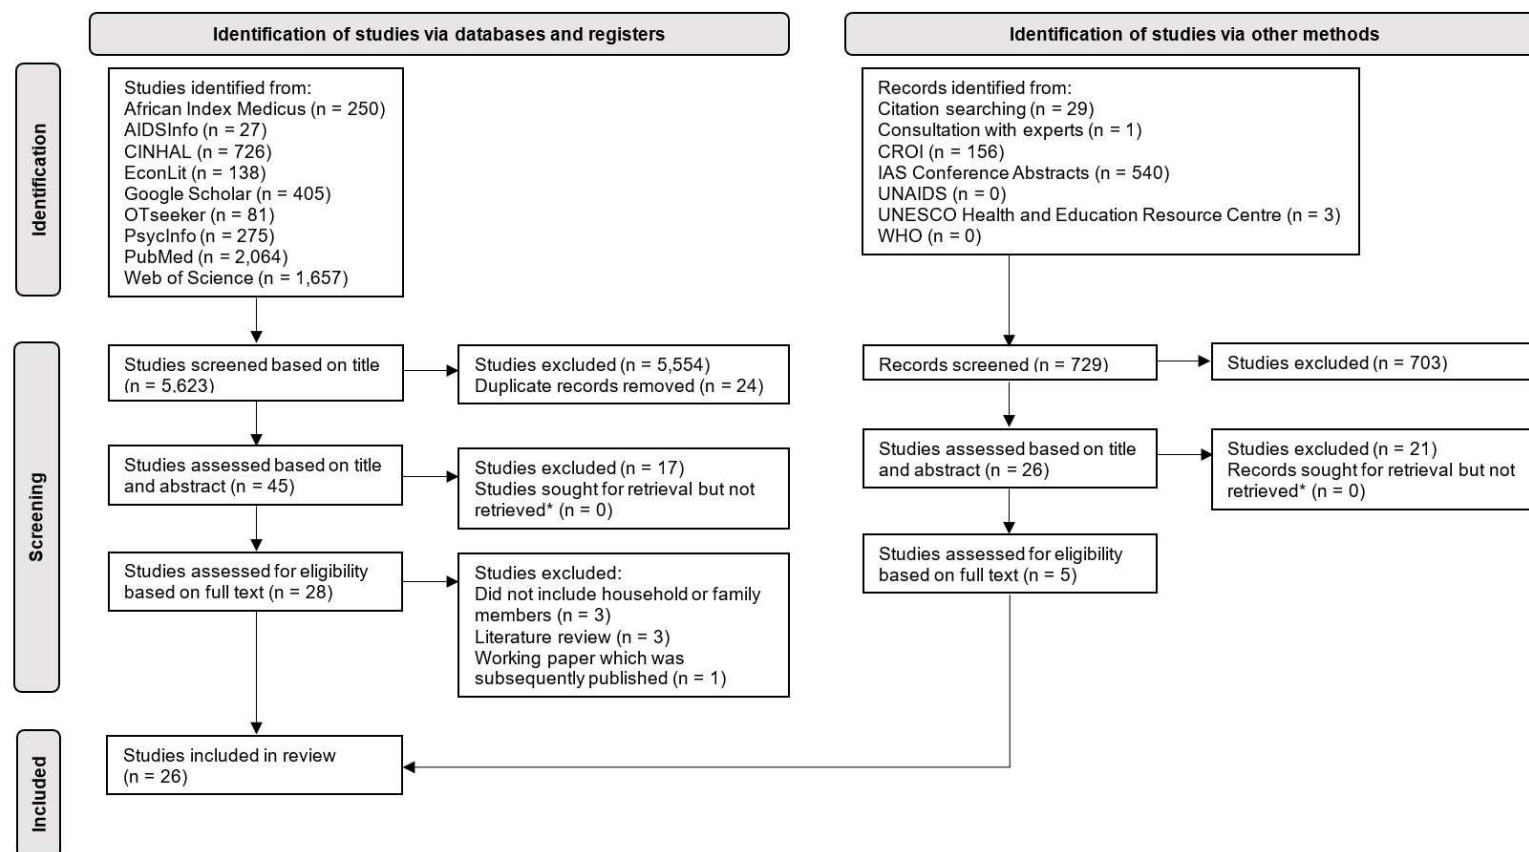

Notes: \* Not retrieved is defined as reports which could not be located for different reasons. In this review, all records sought to include were able to be retrieved (so that n = 0). Source: Page MJ, McKenzie JE, Bossuyt PM, Boutron I, Hoffmann TC, Mulrow CD, et al. The PRISMA 2020 statement: an updated guideline for reporting systematic reviews. *BMJ* 2021;372:n71. doi: 10.1136/bmj.n71.

**Figure S2. Conceptual framework underpinning the study**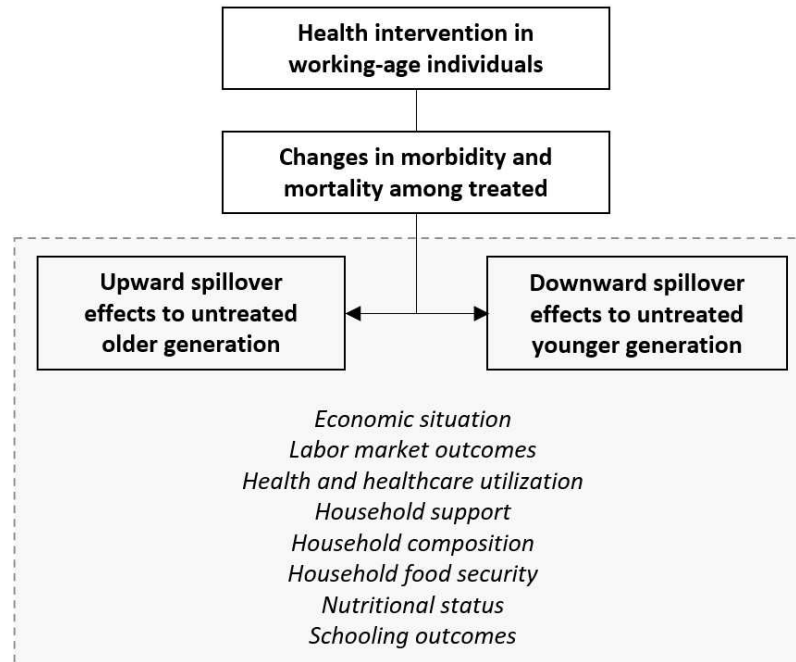

**Table S1. Wealth and labour market outcomes**

| Reference                | Country               | Data source                                                         | Design                                     | Sample                                          | Direction of spillover     | Key findings                                                                                                                                                                                   | Effect size                                                                                                                                                                       |
|--------------------------|-----------------------|---------------------------------------------------------------------|--------------------------------------------|-------------------------------------------------|----------------------------|------------------------------------------------------------------------------------------------------------------------------------------------------------------------------------------------|-----------------------------------------------------------------------------------------------------------------------------------------------------------------------------------|
| Baranov and Kohler, 2018 | Malawi (rural)        | Malawi Longitudinal Study of Families and Health survey             | Quasi-experimental                         | Up to 4,000 individuals (mean age 36.8 years)   | Not specified (all adults) | Increase in ART availability improved economic situation of household                                                                                                                          | Reduction of distance to ART facility by 5.8 km, could increase total saving by 50%                                                                                               |
| Bor et al. 2012          | South Africa (rural)  | Household survey of Africa Centre for Health and Population Studies | Longitudinal / cohort / quasi-experimental | Adults in >10,000 households (ages 18-59 years) | Not specified (all adults) | ART prevented asset loss in households affected by HIV and AIDS-related deaths<br><br>ART and recovery of health led to household members formerly involved in caregiving to regain employment | Not in main text.                                                                                                                                                                 |
| Baranov et al., 2015     | Malawi (rural)        | Malawi Longitudinal Study of Families and Health survey             | Quasi-experimental                         | Up to 4,000 respondents (mean age 34.3 years),  | Not specified (all adults) | ART availability increased labour participation                                                                                                                                                | 'Nearby' ART availability increases daily work time by 37 minutes, farming by 15 minutes and other economic activities by 12 minutes                                              |
| Jakubowski et al., 2018  | Multi-country (rural) | Sustainable East Africa Research in Community Health (SEARCH)       | Cross-sectional                            | 11,500 individuals (ages > 18 years)            | Not specified (all adults) | Household members coresiding with HIV-infected individual with high CD4+ cell count, had same employment outcomes as household members in HIV-negative households                              | Equal probability of working for HIV-negative person in household with an HIV-positive person with CD4>500 compared to HIV-negative person without coresiding HIV-positive person |
| Kaler et al., 2010       | Uganda (rural)        | Interviews and surveys                                              | Qualitative                                | 110 coresident 'treatment                       | Not specified              | ART and recovery of health led to                                                                                                                                                              | Not applicable                                                                                                                                                                    |

|                           |                          |                                                  |                                            |                                                                                                                                                      |                            |                                                                                                                                                             |                                                                                                                                                                                     |
|---------------------------|--------------------------|--------------------------------------------------|--------------------------------------------|------------------------------------------------------------------------------------------------------------------------------------------------------|----------------------------|-------------------------------------------------------------------------------------------------------------------------------------------------------------|-------------------------------------------------------------------------------------------------------------------------------------------------------------------------------------|
|                           |                          |                                                  |                                            | partners' of ART patients (spouses, parents, children and siblings)                                                                                  |                            | reallocation of household expenditures from HIV-infected individual to the general household<br><br>ART did not substantially lead to regain of sold assets |                                                                                                                                                                                     |
| Thirumurthy et al., 2008  | Kenya (rural)            | Socio-economic household surveys                 | Longitudinal / cohort / quasi-experimental | 200 households with at least one HIV-positive adult and 503 households without HIV-positive adults on ART (children ages 8-18 and adults ages 18-65) | Downward                   | ART initiation among HIV-infected adults decreased labour participation of young boys. Labour participation of girls remained unchanged                     | Decline of young boy's labour force participation rates (21.5%) and working hours (by 8.5 hours per week)                                                                           |
|                           |                          |                                                  |                                            |                                                                                                                                                      | Not specified (all adults) | ART among HIV-positive adults did not significantly change labour supply of coresiding adults                                                               | Not applicable                                                                                                                                                                      |
| Tirivayi and Koethe, 2016 | Zambia (urban)           | Patient records of clinics and household surveys | Cross-sectional                            | 112 adult patients on ART and 199 adults coresiding with patients (ages >17 years)                                                                   | Not specified (all adults) | ART and high CD4 counts among HIV patients led to higher labour force participation of coresiding adults                                                    | HIV-negative individuals were 27 percentage points more likely to be in labour force coresiding with an ART patient with CD4 counts > 500 than their counterparts with lower counts |
| Wagner et al., 2009       | Uganda (urban and rural) | Semi-structured interviews                       | Qualitative                                | 24 HIV-positive adults (age range not stated)                                                                                                        | Not specified (all adults) | ART did not substantially lead to a regain of household property that had been sold after HIV-infection                                                     | Not applicable                                                                                                                                                                      |
|                           |                          |                                                  |                                            |                                                                                                                                                      |                            | ART partially led to regain of self-                                                                                                                        |                                                                                                                                                                                     |

|  |  |  |  |  |  |                                                                                     |  |
|--|--|--|--|--|--|-------------------------------------------------------------------------------------|--|
|  |  |  |  |  |  | sufficiency among treated adults who had formerly relied on economic family support |  |
|--|--|--|--|--|--|-------------------------------------------------------------------------------------|--|



**Table S2. Health and health care utilization**

| Reference                | Country        | Data source                                             | Design                                     | Sample                                                                                               | Direction of spillover     | Key findings                                                                                                       | Effect size                                                                                                                                                         |
|--------------------------|----------------|---------------------------------------------------------|--------------------------------------------|------------------------------------------------------------------------------------------------------|----------------------------|--------------------------------------------------------------------------------------------------------------------|---------------------------------------------------------------------------------------------------------------------------------------------------------------------|
| Baranov and Kohler, 2018 | Malawi (rural) | Malawi Longitudinal Study of Families and Health survey | Quasi-experimental                         | Up to 4,000 respondents (mean age 36.8 years)                                                        | Not specified (all adults) | ART decreased self-reported mortality risk                                                                         | Reduction of distance to ART facility by 6 km increases subjective life expectancy by 6 years                                                                       |
| Baranov et al., 2015     | Malawi (rural) | Malawi Longitudinal Study of Families and Health survey | Quasi-experimental                         | Up to 4,000 respondents (mean age 34.3 years)                                                        | Not specified              | ART availability reduced subjective mortality risk and improved mental health                                      | 'Nearby' ART availability reduces subjective mortality risk by 3 percentage points from 2008 to 2010 and improves an established mental health index by 1.06 points |
| Bechange et al., 2010    | Uganda (rural) | Structured interviews                                   | Longitudinal / cohort                      | 455 HIV-negative adults who coresided with a non-spousal HIV-positive adult on ART (18-69 years old) | Not specified (all adults) | ART provision among HIV-positive adults did not increase sexual risk behavior among HIV-negative household members | Risky sexual behavior decreased from 29% to 15% at 24 months                                                                                                        |
| d'Adda et al., 2009      | Kenya (rural)  | Socio-economic household survey                         | Longitudinal / cohort / quasi-experimental | 291 children (8-18 years old)                                                                        | Downward                   | Boys in ART households were more likely to seek health care                                                        | Not in main text.                                                                                                                                                   |

|                       |                      |                                                                           |                       |                                                                                            |                            |                                                                                                                                                                                                                        |                                                                                                                                                                                                           |
|-----------------------|----------------------|---------------------------------------------------------------------------|-----------------------|--------------------------------------------------------------------------------------------|----------------------------|------------------------------------------------------------------------------------------------------------------------------------------------------------------------------------------------------------------------|-----------------------------------------------------------------------------------------------------------------------------------------------------------------------------------------------------------|
|                       |                      |                                                                           |                       |                                                                                            | Not specified (all adults) | Adults in ART households sought less health care                                                                                                                                                                       | Woman living with individual on ART spent about 1 hour per week less time seeking health care (men 1.4 hours respectively)                                                                                |
| Hontelez et al., 2016 | South Africa (rural) | Longitudinal cohort of Wellcome Trust Africa Centre for Population Health | Longitudinal / cohort | 32,319 individuals (ages 15 years or older)                                                | Not specified (all adults) | ART scale-up correlated with HIV-uninfected individuals reporting increasing utilization of public-sector health care in contrast to decreasing use of private-sector health care. The hospitalization rate decreased. | Increase in visits of public sector clinics in last 6 months from 41% to 47%; decrease of visits private sector clinics from 16% to 9%; and hospitalization decreased from 78 to 44 per 1000 person years |
| Mermin et al., 2008   | Uganda (rural)       | Home visits and clinical tests                                            | Longitudinal / cohort | 466 HIV-infected adults and 1481 HIV-uninfected household members (children <10 years old) | Downward                   | ART program among HIV-infected adults led to decrease in child mortality                                                                                                                                               | 81% reduction in mortality of HIV uninfected children                                                                                                                                                     |
| Mfundisi et al., 2005 | South Africa (urban) | Quantitative interviews                                                   | Cross-sectional       | 184 individuals (>14 years old, mean age 28.6 years)                                       | Not specified              | Knowing someone on ART increased likelihood to attend HIV counselling and testing                                                                                                                                      | 58% of those who knew someone on ART had been tested compared with 48% of those who did not know someone on ART, for woman 68% versus 48% respectively                                                    |

**Table S3. Food security and nutrition**

| Reference              | Country                  | Data source                                                               | Design             | Sample                                                               | Direction of spillover     | Key findings                                                                                                                    | Effect size                                                                                                                                                         |
|------------------------|--------------------------|---------------------------------------------------------------------------|--------------------|----------------------------------------------------------------------|----------------------------|---------------------------------------------------------------------------------------------------------------------------------|---------------------------------------------------------------------------------------------------------------------------------------------------------------------|
| Lucas and Wilson, 2013 | Zambia (urban and rural) | Zambian HIV/AIDS services, Demographic and Health surveys                 | Quasi-experimental | Children (0-5 years old)                                             | Downward                   | ART availability correlated with reduction in children's malnutrition and increase in weight-for-age                            | Not in main text.                                                                                                                                                   |
| Patenaude et al., 2018 | South Africa (rural)     | Longitudinal medical and socio-demographic data from ongoing cohort study | Quasi-experimental | 5540 adults (18 years and older) and children (age range not stated) | Downward                   | ART initiation increased the probability of household food insecurity in the first year and diminished to zero within 1-3 years | ART initiation led to an increase in the probability of children coresiding in surveyed households to have missed a meal in the past month by 8.9 percentage points |
|                        |                          |                                                                           |                    |                                                                      | Not specified (all adults) |                                                                                                                                 | ART initiation led to an increase in the probability of adults coresiding in surveyed households to have missed a meal in the past month by 15.2 percentage points  |
| Zivin et al., 2009     | Kenya (rural)            | Socio-economic surveys                                                    | Quasi-experimental | 41 children (0-5 years old)                                          | Downward                   | Early ART improved nutritional status of children                                                                               | Early-stage ART of coresiding adults associated with increase in weight-for-age Z-score and weight-for-height of children by 0.60 standard deviations               |

**Table S4. Schooling outcomes**

| Reference                | Country                  | Data source                                                                                    | Design                      | Sample                                                                                                                                                   | Direction of spillover | Key findings                                                                                     | Effect size                                                                                                                                                                                                                                                                                                                                                                                                            |
|--------------------------|--------------------------|------------------------------------------------------------------------------------------------|-----------------------------|----------------------------------------------------------------------------------------------------------------------------------------------------------|------------------------|--------------------------------------------------------------------------------------------------|------------------------------------------------------------------------------------------------------------------------------------------------------------------------------------------------------------------------------------------------------------------------------------------------------------------------------------------------------------------------------------------------------------------------|
| Baranov and Kohler, 2018 | Malawi (rural)           | Malawi Longitudinal Study of Families and Health survey                                        | Quasi-experimental          | Up to 4,000 individuals (ages 5-19 years)                                                                                                                | Downward               | Increase in ART availability increased expenditures on education and improved schooling outcomes | Halving distance to ART facility increases expenditures on children's education by \$US 2.5 and increases years of schooling by 0.33                                                                                                                                                                                                                                                                                   |
| Jakubowski et al., 2022  | Multi-country (rural)    | Sustainable East Africa Research in Community Health (SEARCH), socioeconomic household surveys | Randomized controlled trial | 34,029 HIV-positive or -negative individuals and their household members<br>Survey with 9412 adults (18-65 years old) and 6755 children (6-17 years old) | Downward               | Universal HIV testing and treatment (UTT) led to higher school completion rates for children     | Children's primary school completion rate in households with HIV-positive adults in intervention community in comparison to control community was:<br>7.3% higher for children in households with an HIV-positive adult;<br>10.8% (0.6–22.7) higher in households with adults with high CD4 cell count;<br>4.5% (1.5–9.8) higher in households with adults with low CD4 cell count than children in similar households |
| Lucas et al., 2019       | Zambia (urban and rural) | Zambian Demographic and Health Survey                                                          | Quasi-experimental          | Children in expected grades 1–7 (primary school aged)                                                                                                    | Downward               | ART availability for HIV-infected adults improved school outcomes for children                   | ART availability did not differentially affect the likelihood that coresiding primary school aged children enrolled in school on time, however increased the likelihood to be the appropriate grade-for-age by 49%                                                                                                                                                                                                     |

|                          |                          |                                                        |                        |                                                                                |          |                                                                                                                         |                                                                                                                            |
|--------------------------|--------------------------|--------------------------------------------------------|------------------------|--------------------------------------------------------------------------------|----------|-------------------------------------------------------------------------------------------------------------------------|----------------------------------------------------------------------------------------------------------------------------|
| Thirumurthy et al., 2013 | Uganda (rural)           | Programmatic data and socio-economic household surveys | Cross-sectional design | 179 HIV-positive adults (18 years and older), 107 children (6-18 years of age) | Downward | Higher CD4 cell counts in HIV-infected adults was likely associated with improved school enrolment outcomes of children | Children had a 7% higher probability to be enrolled in school coresiding with adult with CD4 $\geq$ 350 than adult CD4<350 |
| Wagner et al., 2011      | Uganda (urban and rural) | Semi-structured interviews                             | Qualitative            | 24 HIV-positive adults (spouses, partner, children)                            | Downward | ART partially enabled children who had dropped out of school to re-enrol                                                | Not applicable                                                                                                             |
| Zivin et al., 2009       | Kenya (rural)            | Socio-economic surveys                                 | Quasi-experimental     | 128 children in households with at least one HIV+ adult (8-18 years old)       | Downward | ART among adults increased school attendance for children                                                               | Within 6 months after ART initiation of coresiding adults weekly school attendance for children increased by 6 hours (20%) |

**Table S5. Caregiving responsibilities**

| Reference             | Country                        | Data source                     | Design                                     | Sample                                                                                        | Direction of spillover     | Key findings                                                                                                | Effect size                                                                                                                                                            |
|-----------------------|--------------------------------|---------------------------------|--------------------------------------------|-----------------------------------------------------------------------------------------------|----------------------------|-------------------------------------------------------------------------------------------------------------|------------------------------------------------------------------------------------------------------------------------------------------------------------------------|
| d'Adda et al., 2009   | Kenya (rural)                  | Socio-economic household survey | Longitudinal / cohort / quasi-experimental | 178 adults (18-65 years of age), 291 children (8-18 years old)                                | Downward                   | ART and recovery of health among adult household members led to decrease of children doing household chores | ART among adult household members reduced housework of boys on average by 2.4 hours in the past week and time spent on collecting water by 0.86 hours for girls        |
|                       |                                |                                 |                                            |                                                                                               | Not specified (all adults) | ART and decrease in need of caregiving support provided by family members                                   | Not in main text.                                                                                                                                                      |
| Kakinami et al., 2011 | South Africa (urban and rural) | Structured questionnaire        | Longitudinal / cohort                      | 4328 HIV-positive adults (> 17 years old)                                                     | Not specified (all adults) | ART reduced the burden of HIV-related care for family members                                               | ART among HIV-positive adults reduced the necessity of assistance in instrumental activities of daily living by 17% in the rural cohort and by 41% in the urban cohort |
| Kaler et al., 2010    | Uganda (rural)                 | Interviews and surveys          | Qualitative                                | 110 coresident 'treatment partners' of ART patients (spouses, parents, children and siblings) | Not specified (all adults) | ART enabled household members involved in caregiving to return to former activities                         | Not applicable                                                                                                                                                         |
| Nalugya et al., 2018  | Uganda (urban and rural)       | Semi-structured interviews      | Qualitative                                | 38 HIV-positive parents (children ages 1-47 years old)                                        | Downward                   | Children had important caregiving role for HIV positive parents on ART                                      | Not applicable                                                                                                                                                         |

**Table S6. Coresidence and relationships**

| Reference            | Country                              | Data source                                                                          | Design                | Sample                                                                                     | Direction of spillover | Key findings                                                                                          | Effect size                                                                                                                                                                                                                                                                         |
|----------------------|--------------------------------------|--------------------------------------------------------------------------------------|-----------------------|--------------------------------------------------------------------------------------------|------------------------|-------------------------------------------------------------------------------------------------------|-------------------------------------------------------------------------------------------------------------------------------------------------------------------------------------------------------------------------------------------------------------------------------------|
| Anema et al., 2011   | Multi-country (urban and rural)      | Cohort studies, UNAIDS, UN Population Division, WHO and the US Census Bureau         | Modeling study        | AIDS orphans (children ages <17 years old)                                                 | Downward               | Universal ART among HIV+ adults decreased the likelihood of AIDS-related orphanhood                   | Universal ART may avert over 4 million orphans over next 10 years.                                                                                                                                                                                                                  |
| De Neve et al., 2018 | Sub-Saharan Africa (urban and rural) | Demographic and Health Surveys, AIDS Indicator Surveys and Malaria Indicator Surveys | Longitudinal / cohort | 297,331 older adults (ages 60 years or older)                                              | Upward                 | Increase in ART coverage was associated with increase in coresidence of working-age with older adults | 1% increase in ART coverage associated with reduction of 0.7 percentage point in the probability of an older adult living without working-age adult and 0.2 percentage point in the probability of an older adult living in household with grandchildren and no children household. |
| Makumbi et al., 2012 | Uganda (rural)                       | Rakai Community Cohort Study                                                         | Longitudinal / cohort | Children (ages 0–14 years old)                                                             | Downward               | Prevalence and incidence of orphanhood declined during the implementation of HIV care                 | Prevalence: from 17.2% during pre-HIV care roll-out to 12.6% at expanded HIV care period; Incidence: from 2.10/100 person-years during pre-HIV care roll-out to 1.07/100 person years at expanded HIV care period                                                                   |
| Mermin et al., 2008  | Uganda (rural)                       | Home visits and clinical tests                                                       | Longitudinal / cohort | 466 HIV-infected adults and 1481 HIV-uninfected household members (children <10 years old) | Downward               | ART program reduced orphanhood                                                                        | 93% reduction in orphanhood                                                                                                                                                                                                                                                         |

|                     |                          |                                    |             |                                                     |                            |                                                                                                                                                                                 |                |
|---------------------|--------------------------|------------------------------------|-------------|-----------------------------------------------------|----------------------------|---------------------------------------------------------------------------------------------------------------------------------------------------------------------------------|----------------|
| Siu et al., 2014    | Uganda (rural)           | Observational notes and interviews | Qualitative | 26 adults (ages 27-51 years old)                    | Not specified (all adults) | ART partly led to recovery of masculine identities with implications for the household e.g., increased tolerance to gender equality and rejection of extramarital relationships | Not applicable |
| Wagner et al., 2011 | Uganda (urban and rural) | Semi-structured interviews         | Qualitative | 24 HIV-positive adults (spouses, partner, children) | Not specified (all adults) | ART partially restored disrupted social relationships within families                                                                                                           | Not applicable |
